# Supplementary material for: Stromal fibroblast growth factor 2 reduces the efficacy of bromodomain inhibitors in uveal melanoma
Source: PubMed Central journal article supplement (PMC6365926; doi:10.15252/emmm.201809081), 2019-01-04

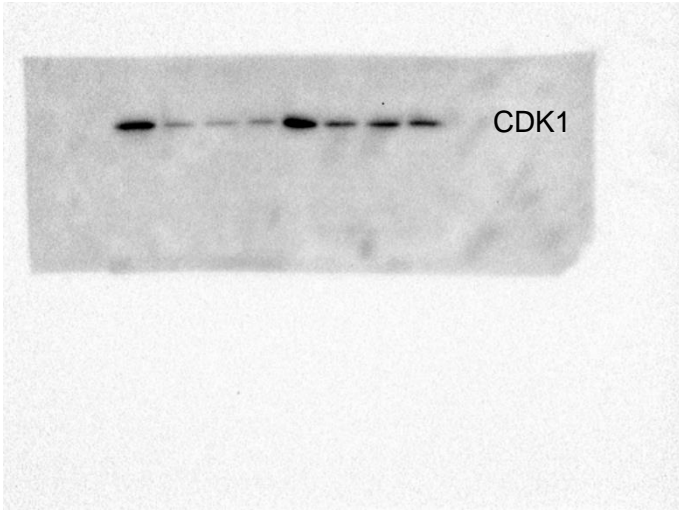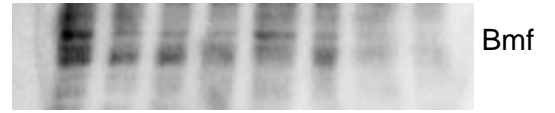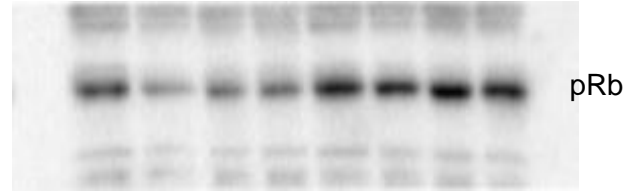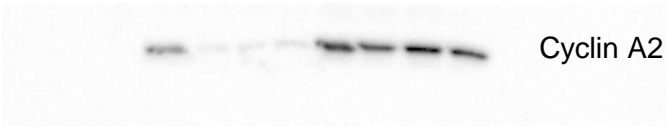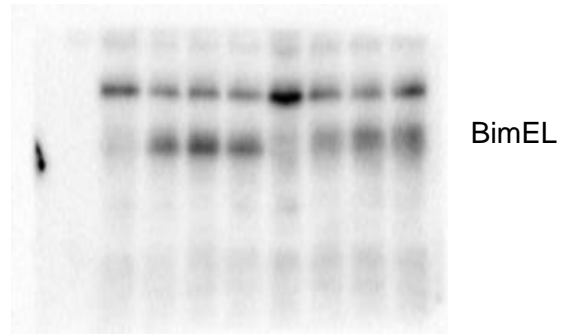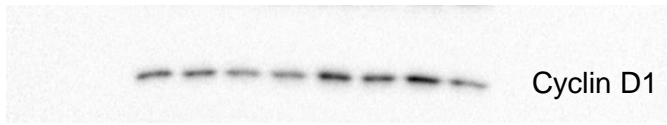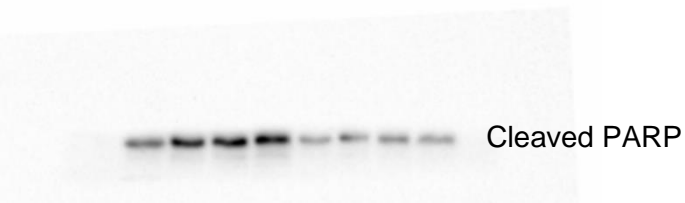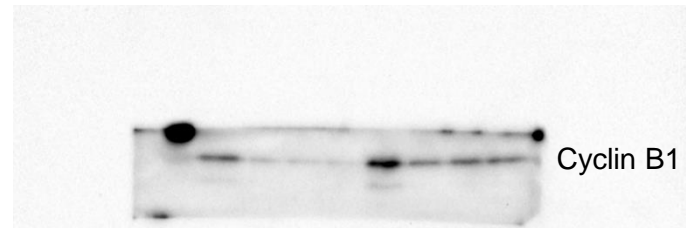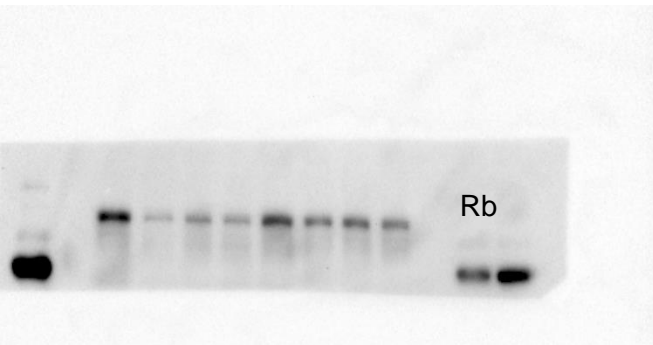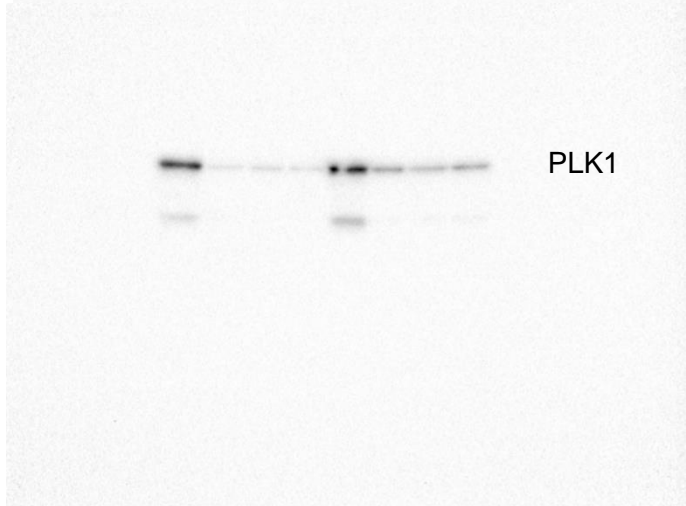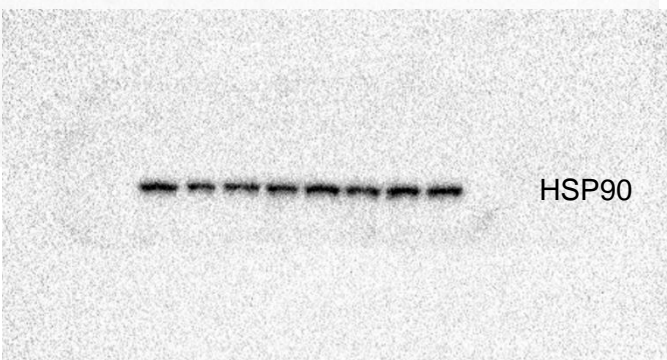



CDK1



Cyclin A2



pRb

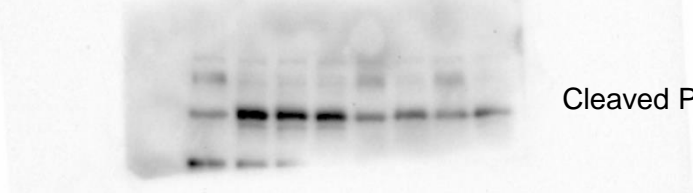

Cleaved PARP

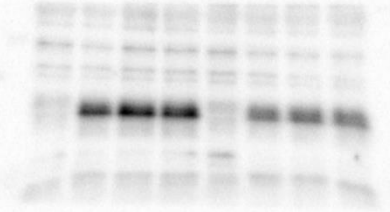

BimEL

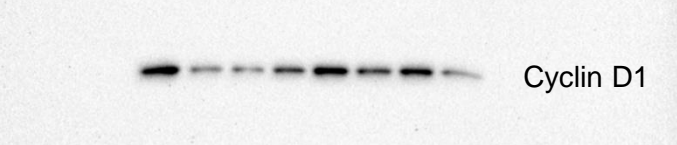

Cyclin D1



Cyclin B1



Bmf



Rb

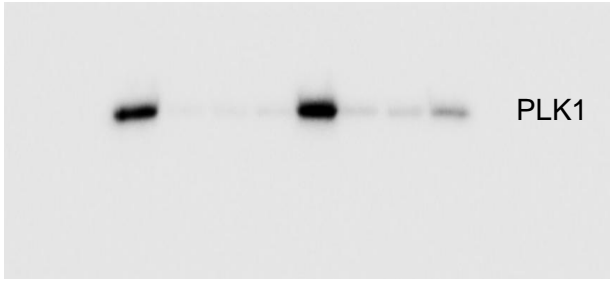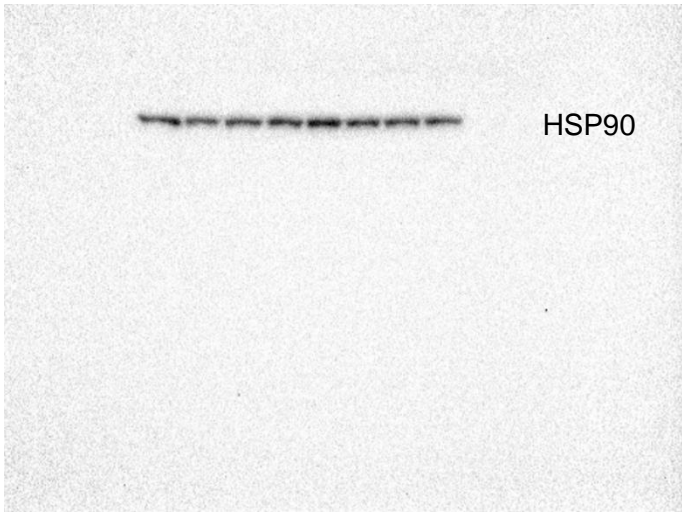



CDK1



Bmf



pRb



Cyclin D1



BimEL

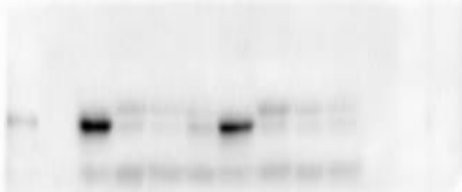

Cyclin A2

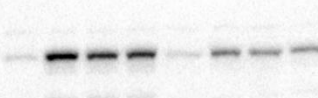

Cleaved PARP



Rb



Cyclin B1



PLK1

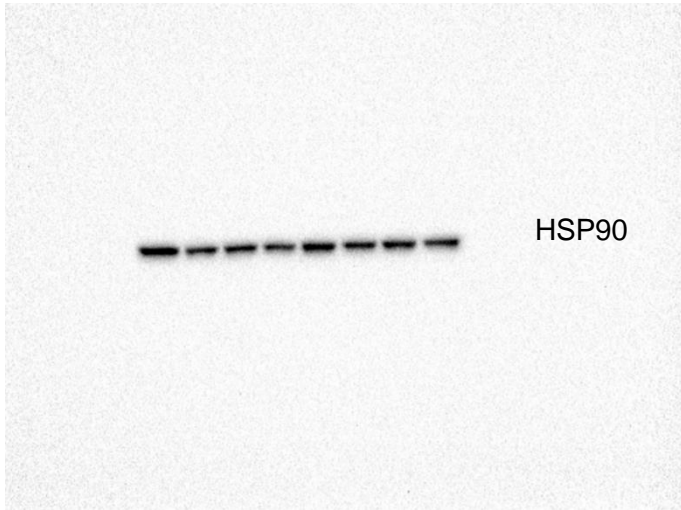

Supplement: EMMM-11-e9081-s003.pdf [file EMMM-11-e9081-s003.pdf]
