# Supplementary material for: Stromal fibroblast growth factor 2 reduces the efficacy of bromodomain inhibitors in uveal melanoma
Source: PubMed Central journal article supplement (PMC6365926; doi:10.15252/emmm.201809081), 2019-01-04

**UM001**

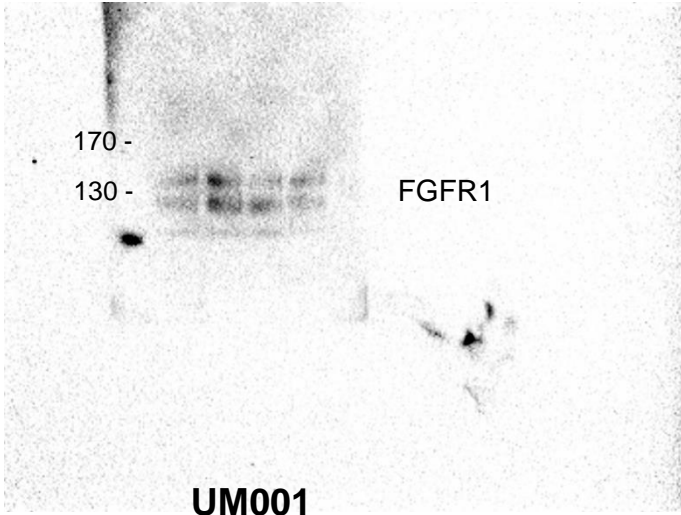

**UM001**

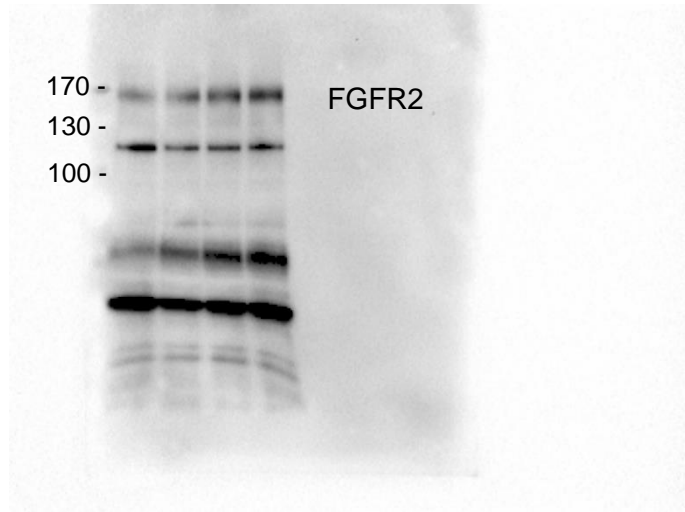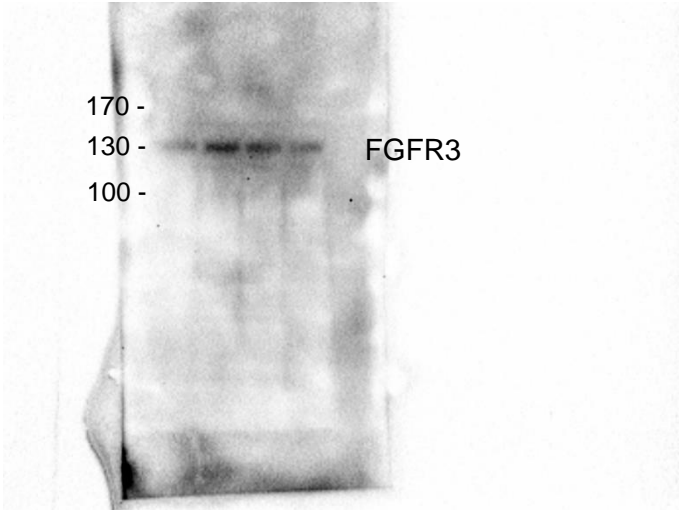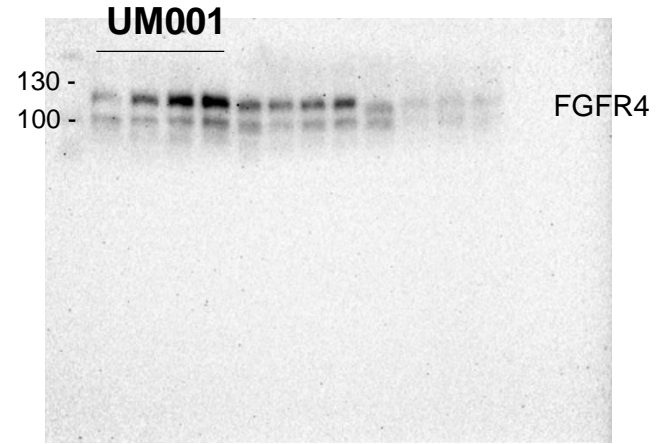

**UM001**

Actin

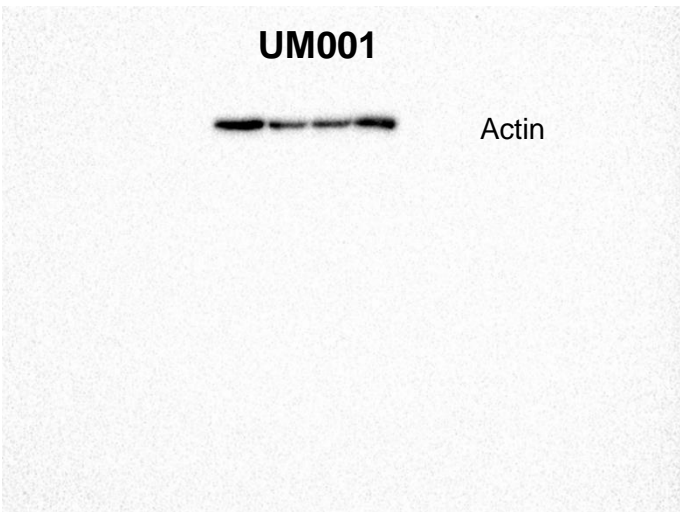

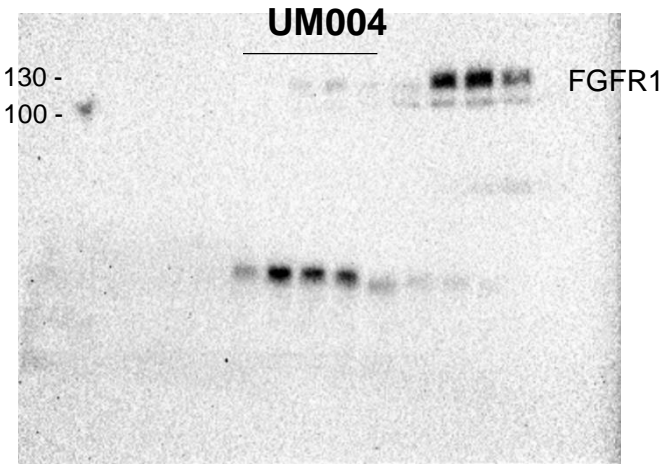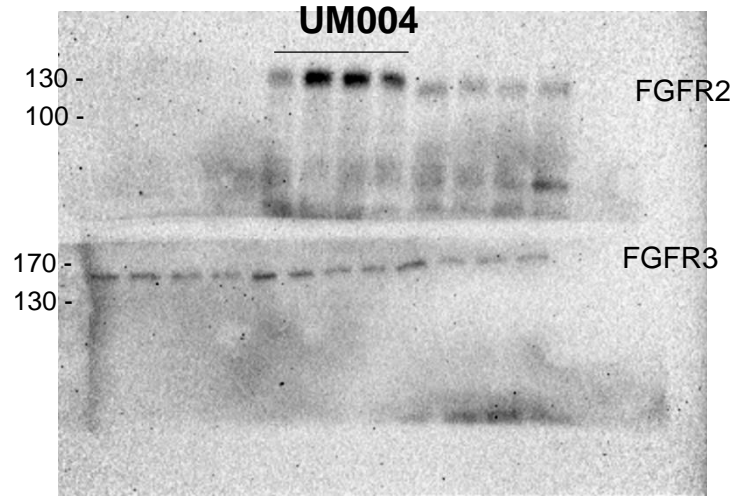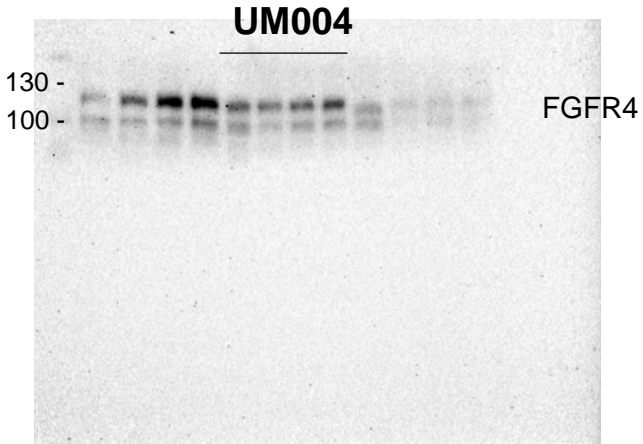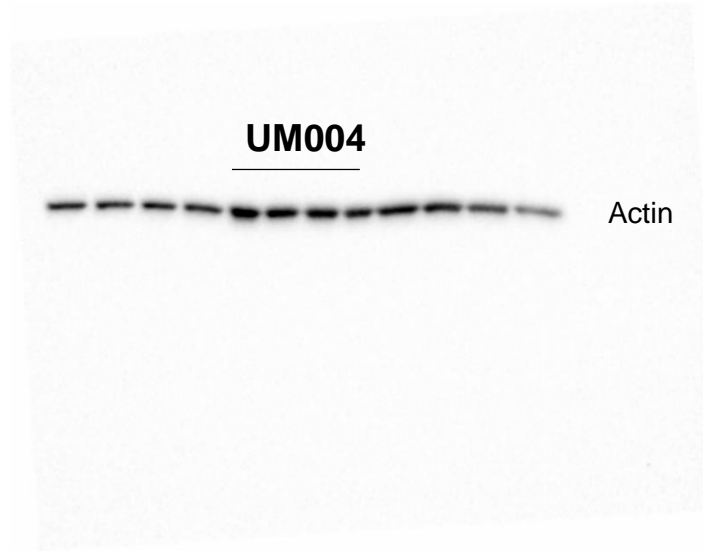

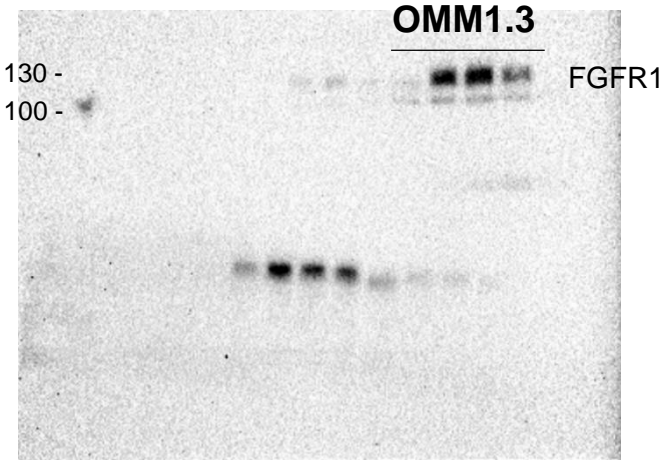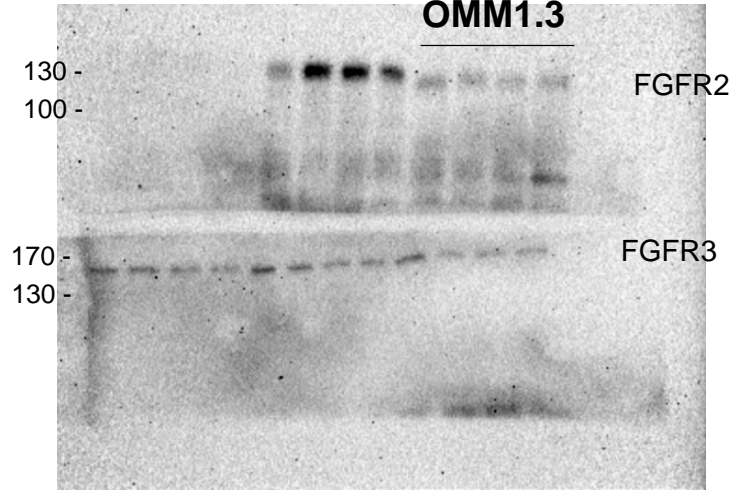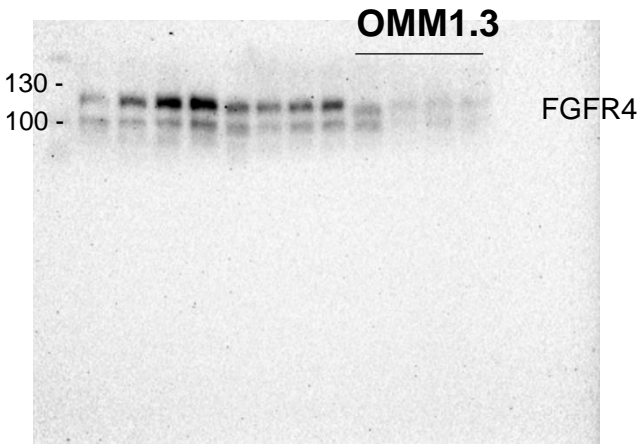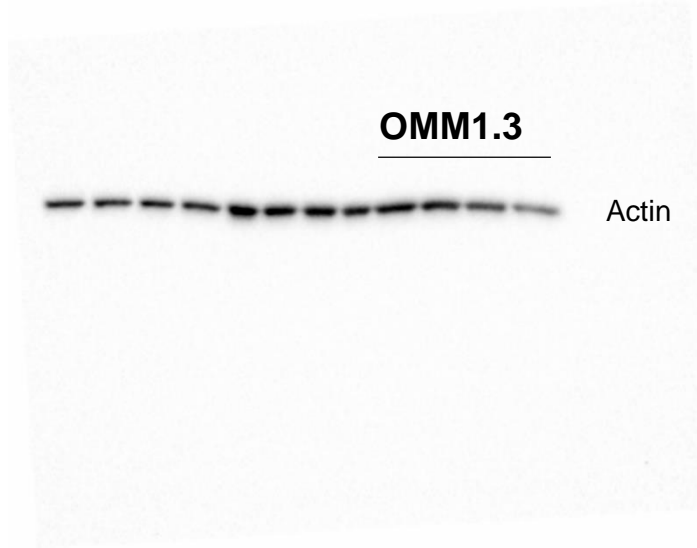

Supplement: EMMM-11-e9081-s004.pdf [file EMMM-11-e9081-s004.pdf]
